# Supplementary material
Source: PubMed Central journal article supplement (PMC1637057)

### Supplemental Figure 1

Localization of glutamate transporters in the neuropil.

Pre-embedding immunocytochemistry in stimulated neuropil showed that GLT1 (upper left panel) and GLAST (upper right panel) immunoreactivity was confined to astrocytic processes (star), shown here surrounding a dendritic spine head (**S**) and axonal bouton (**B**). EAAC1 staining (3 lower panels), however, was confined to the neuronal compartments, particularly dendritic spines (**S**) and dendritic shafts (**DS**), with the astrocytic compartments showing no labelling (star). Micrographs are the same magnification and scale bar is 0.5  $\mu\text{m}$ .

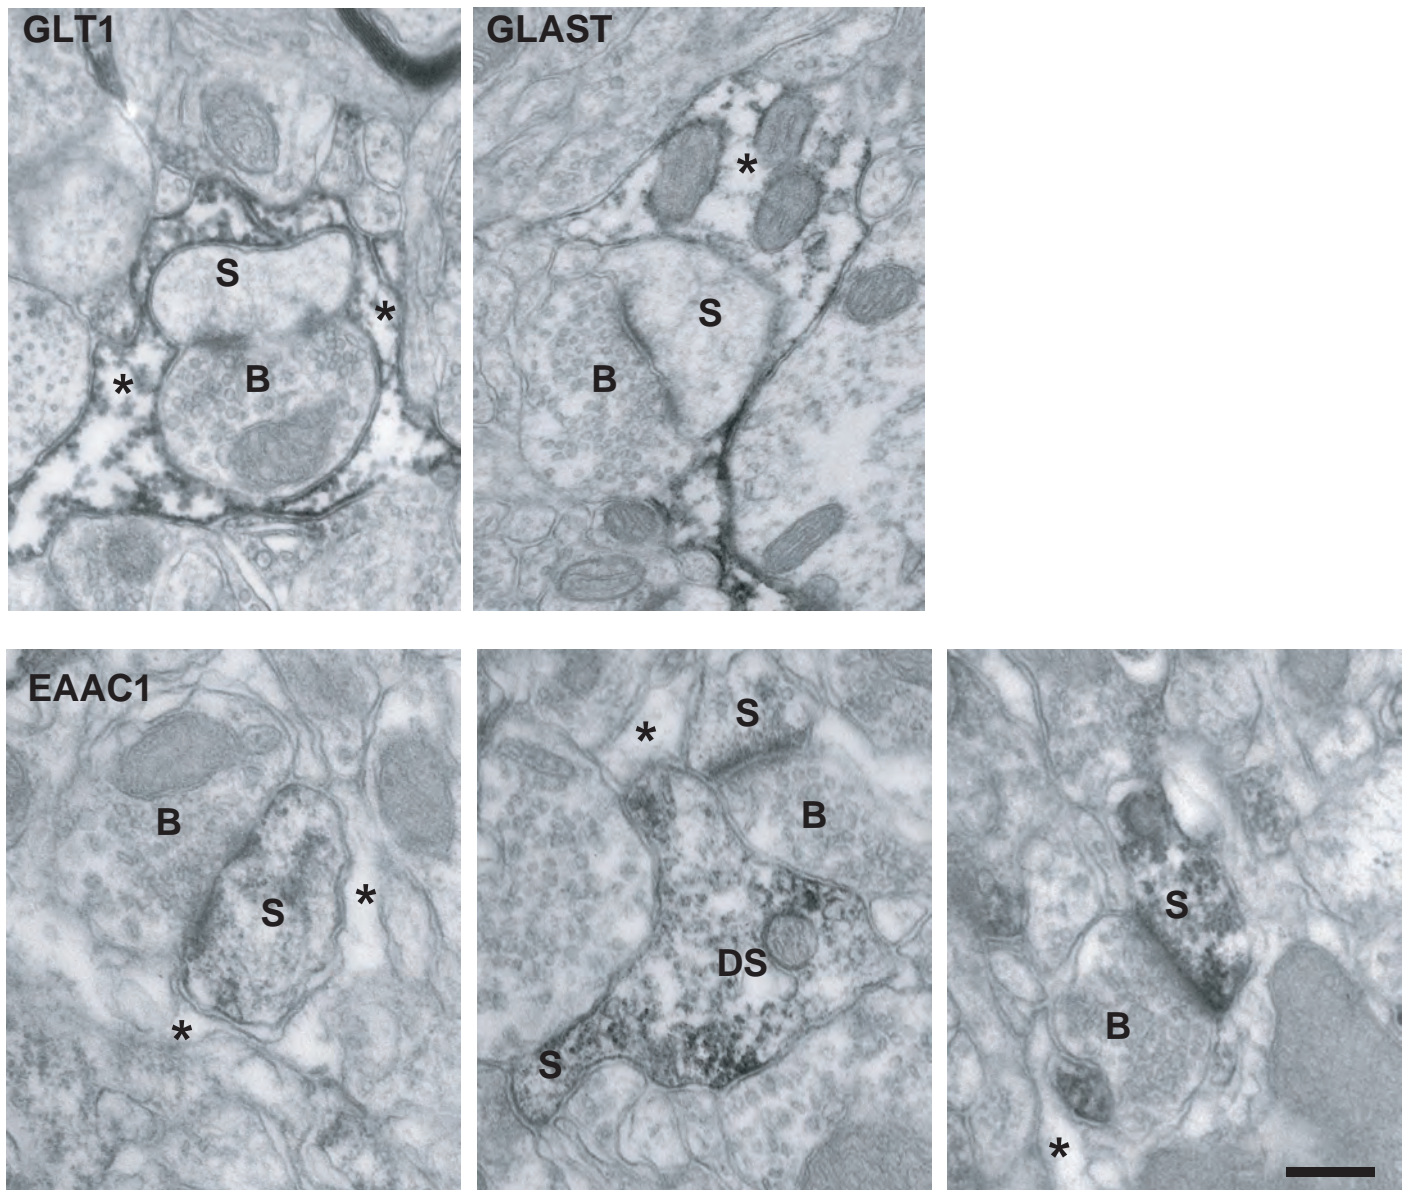

Supplement: pbio.0040343.sg001.pdf [file pbio.0040343.sg001.pdf]
